# Supplementary material for: Cyclohexamer [-(d-Phe-azaPhe-Ala)2-]: good candidate to formulate supramolecular organogels
Source: Royal Society of Chemistry journal article supplement (doi:10.1039/d0ra07775e), 2020-01-01
Supplement: d0ra07775e1.pdf [file d0ra07775e1.pdf]

## Supporting Information

### Cyclohexamer [-(D-Phe-azaPhe-Ala)<sub>2</sub>]: good candidate to formulate supramolecular organogels.

Mohamed I. A. Ibrahim,<sup>\*a, b</sup> Guillaume Pickaert,<sup>a</sup> Loïc Stefan,<sup>a</sup> Brigitte Jamart-Grégoire,<sup>a</sup> Jacques Bodiguel,<sup>a</sup> and Marie-Christine Averlant-Petit<sup>\*a</sup>

<sup>a</sup>Laboratoire de Chimie-Physique Macromoléculaire (LCPM), UMR 7375, CNRS, Université de Lorraine, Nancy, France.

<sup>b</sup>Laboratory of Marine Chemistry, Marine Environment Division, National Institute of Oceanography and Fisheries (NIOF), Alexandria, Egypt.

### TABLE OF CONTENTS

|                                                                                                                                                                                                                                                                                                                                                      |    |
|------------------------------------------------------------------------------------------------------------------------------------------------------------------------------------------------------------------------------------------------------------------------------------------------------------------------------------------------------|----|
| Figure S1. (a) Gelation tests in different solvents (T = toluene, <i>p</i> -X = <i>p</i> -xylene, CB = chlorobenzene and B = benzene), and (b) aerogel of <b>2</b> from toluene obtained under supercritical CO <sub>2</sub> condition.                                                                                                              | 2  |
| Figure S2. <sup>1</sup> H NMR (600 MHz) of compound <b>2</b> in toluene- <i>d</i> <sub>8</sub> ; (0.1 mM at 293 K).....                                                                                                                                                                                                                              | 2  |
| Figure S3. 2D ROESY spectrum of hetero cyclohexamer <b>2</b> in toluene- <i>d</i> <sub>8</sub> ; (1.0 mM at 293 K) illustrating the ROE correlations of conformers 2A and 2B.....                                                                                                                                                                    | 3  |
| Figure S4a. Temperature-dependent <sup>1</sup> H NMR (300 MHz) of compound <b>2</b> in gel state (0.5 wt%) in benzene- <i>d</i> <sub>6</sub> .....                                                                                                                                                                                                   | 3  |
| Figure S4b. Temperature-dependent <sup>1</sup> H NMR (300 MHz) of compound <b>2</b> in gel state (0.5 wt%) in chlorobenzene- <i>d</i> <sub>5</sub> .....                                                                                                                                                                                             | 4  |
| Figure S4c. Temperature-dependent <sup>1</sup> H NMR (300 MHz) of compound <b>2</b> in gel state (0.5 wt%) in <i>p</i> -xylene- <i>d</i> <sub>10</sub> .....                                                                                                                                                                                         | 4  |
| Figure S5. Comparison of the ATR-FTIR spectra in the crystal (black), aerogel (red), and xerogel (blue) states for <b>2</b> ; a) NH stretching region, and b) CO stretching region.....                                                                                                                                                              | 5  |
| Figure S6. Temperature-dependent FTIR spectra of organogels from <b>2</b> at c = 0.5 wt %: (a, b) benzene (T = 25 to 70 °C), (c, d) chlorobenzene (T = 25 to 90 °C), and (e, f) <i>p</i> -xylene (T = 25 °C to 90 °C).....                                                                                                                           | 6  |
| Figure S7. Sol-to-gel transition temperature (T <sub>g</sub> ) by FTIR at the inflection point of the two curves of the free NH (3410 cm <sup>-1</sup> ) and bound CO (1628 cm <sup>-1</sup> ) groups for toluene- <i>d</i> <sub>8</sub> gel form <b>2</b> at 0.5 wt %.....                                                                          | 7  |
| Figure S8. Oscillatory stress sweep experiments (OSS) for organogels of <b>2</b> (c = 0.5 wt%, ω = 0.63 rad. s <sup>-1</sup> , T = 25 °C).....                                                                                                                                                                                                       | 7  |
| Figure S9. The rheogram shows the oscillatory time sweep experiments (OTS) for the organogels from <b>2</b> ; (c = 0.5 wt%, ω = 0.628 rad s <sup>-1</sup> , σ = 1.5 Pa, T = 25 °C).....                                                                                                                                                              | 7  |
| Figure S10. The rheograms for the oscillatory temperature sweep experiments, plot of the elastic (G') and viscous (G'') moduli as a function of temperature (T) for a range of concentrations in the different gelled solvents: a) benzene, b) chlorobenzene, c) toluene, and d) <i>p</i> -xylene; (ω = 0.628 rad s <sup>-1</sup> , σ = 1.5 Pa)..... | 8  |
| Figure S11. Oscillatory temperature sweep experiment shows the transition temperature of gel <b>2</b> from toluene (T <sub>g</sub> = ~ 67 °C); (c = 0.5 wt%, σ = 1.5 Pa, ω = 0.628 rad s <sup>-1</sup> ).....                                                                                                                                        | 9  |
| Figure S12. Variation of T <sub>g</sub> (°C) as a function of concentration (wt%) for the organogels of <b>2</b> from different gelled solvents.....                                                                                                                                                                                                 | 9  |
| Figure S13. The rheogram of the oscillatory frequency sweep experiments (OFS); G' and G'' as a function of angular frequency at the T <sub>g</sub> of toluene gel from <b>2</b> ; (c = 0.5 wt %, T = 65 °C, σ = 1.5 Pa).....                                                                                                                         | 9  |
| Figure S14. The rheogram shows the oscillatory frequency sweep experiments (OFS), plot of the average values of G' and G'' for a range of concentrations in the different gelled solvents as a function of angular frequency (ω); (c = 0.4 - 1.0 wt %, T = 25 °C, σ = 1.5 Pa).                                                                       | 10 |
| Figure S15. SEM images of xerogels obtained from air-drying of organogels of <b>2</b> from: (a) toluene, (b) benzene, (c) chlorobenzene, and (d) <i>p</i> -xylene.....                                                                                                                                                                               | 10 |
| Figure S16. PSG by gelator <b>2</b> : (a) addition of the concentrated ethanolic solution of <b>2</b> (c = 25 % w/v) to organic/aqueous mixture, (b) gelation of the organic phase, and (c) separation of the organogel by filtration.....                                                                                                           | 11 |
| Table S1. % of recovered organic solvent from (water/organic) mixture by PSG method.....                                                                                                                                                                                                                                                             | 11 |

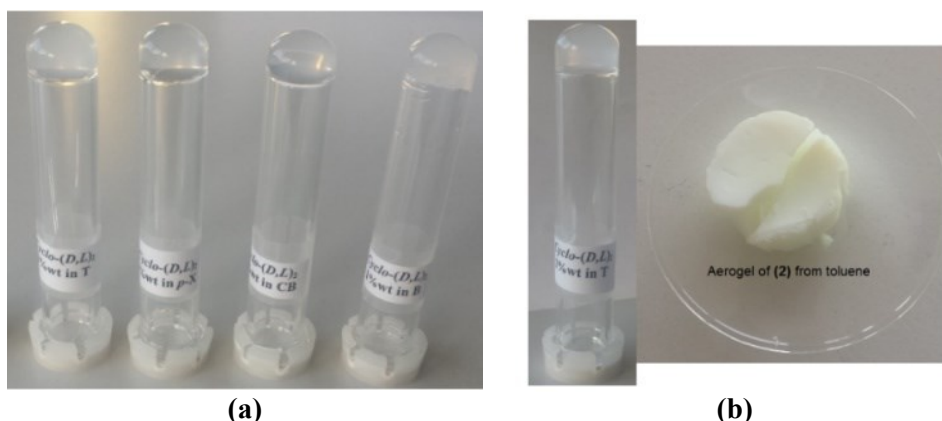

**Figure S1.** (a) Gelation tests in different solvents (T = toluene, *p*-X = *p*-xylene, CB = chlorobenzene and B = benzene), and (b) aerogel of **(2)** from toluene obtained under supercritical CO<sub>2</sub> condition.

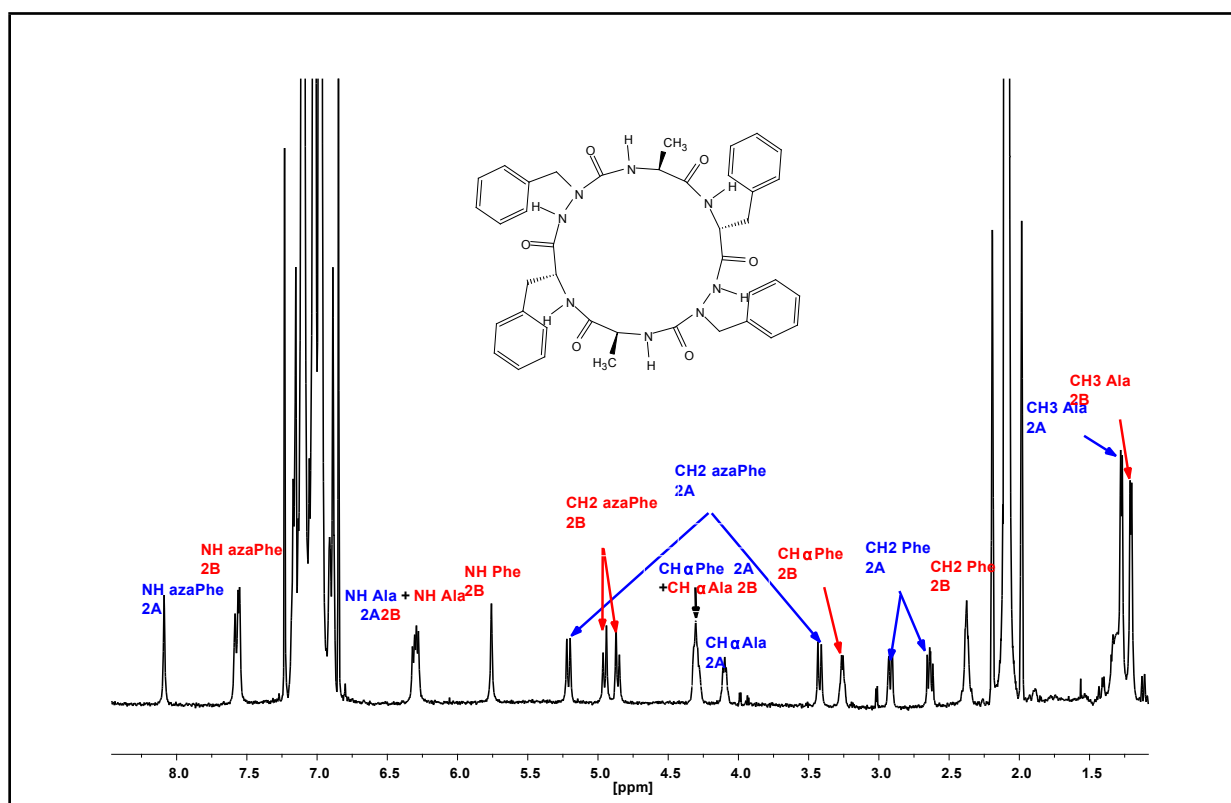

**Figure S2.** <sup>1</sup>H NMR (600 MHz) of compound **(2)** in toluene-*d*<sub>8</sub>; (1.0 mM at 293 K).

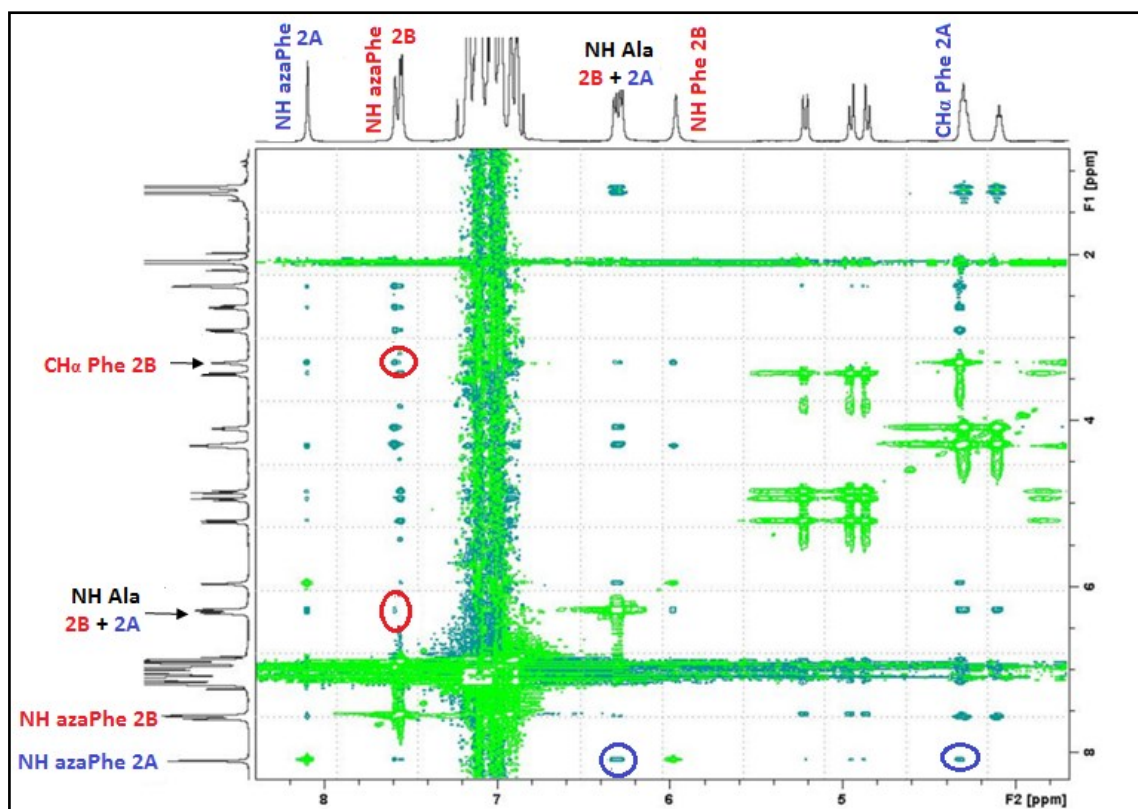

**Figure S3.** 2D ROESY spectrum of hetero cyclohexamer (**2**) in toluene- $d_8$ ; (1.0 mM at 293 K) illustrating the ROE correlations of conformers **2A** and **2B**.

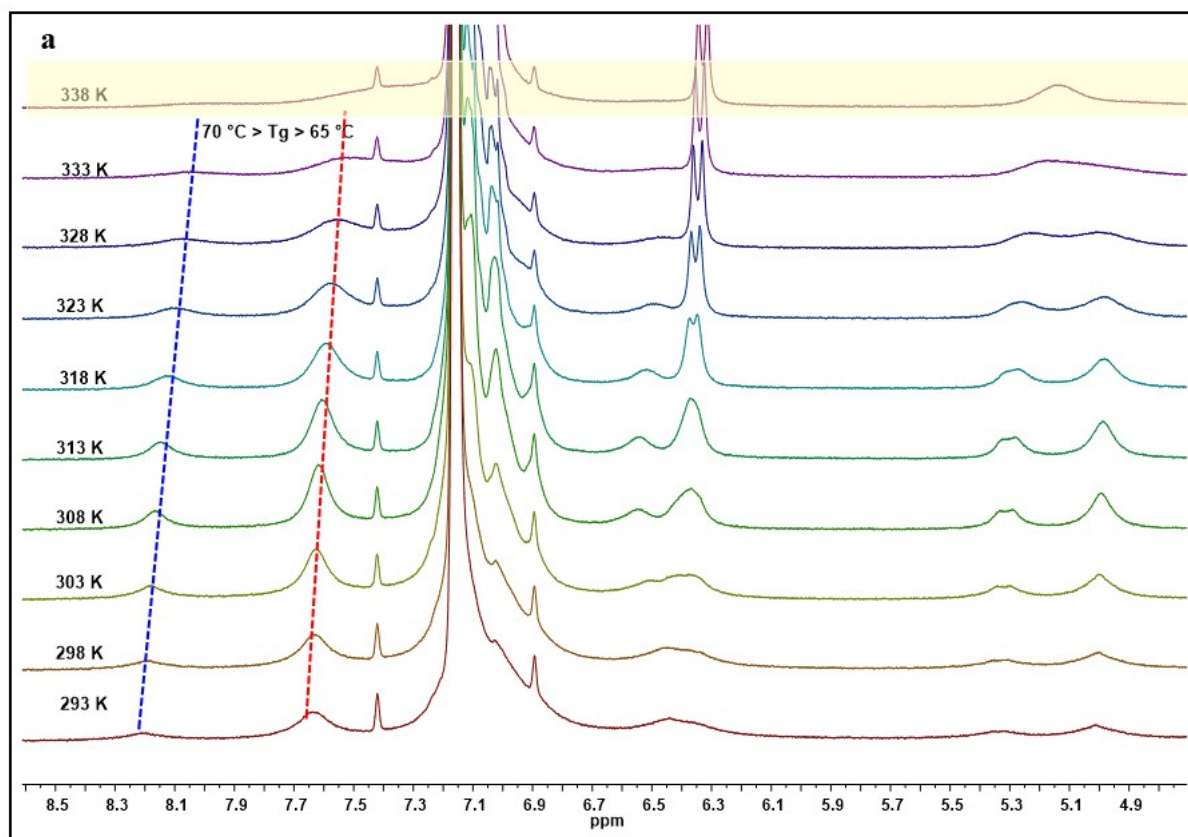

**Figure S4a.** Temperature-dependent  $^1\text{H}$  NMR (300 MHz) of compound (**2**) in gel state (0.5 wt%) in benzene- $d_6$ .

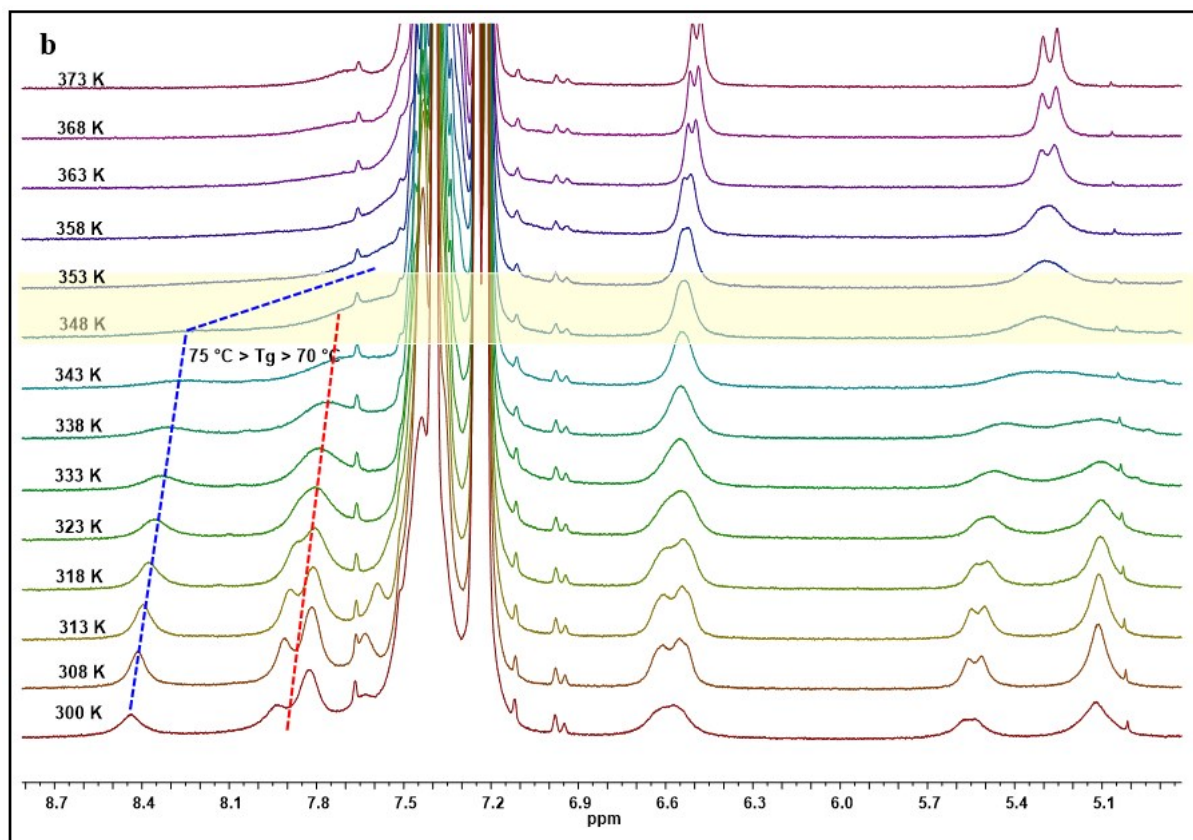

**Figure S4b.** Temperature-dependent  $^1\text{H}$  NMR (300 MHz) of compound **(2)** in gel state (0.5 wt%) in chlorobenzene- $d_5$ .

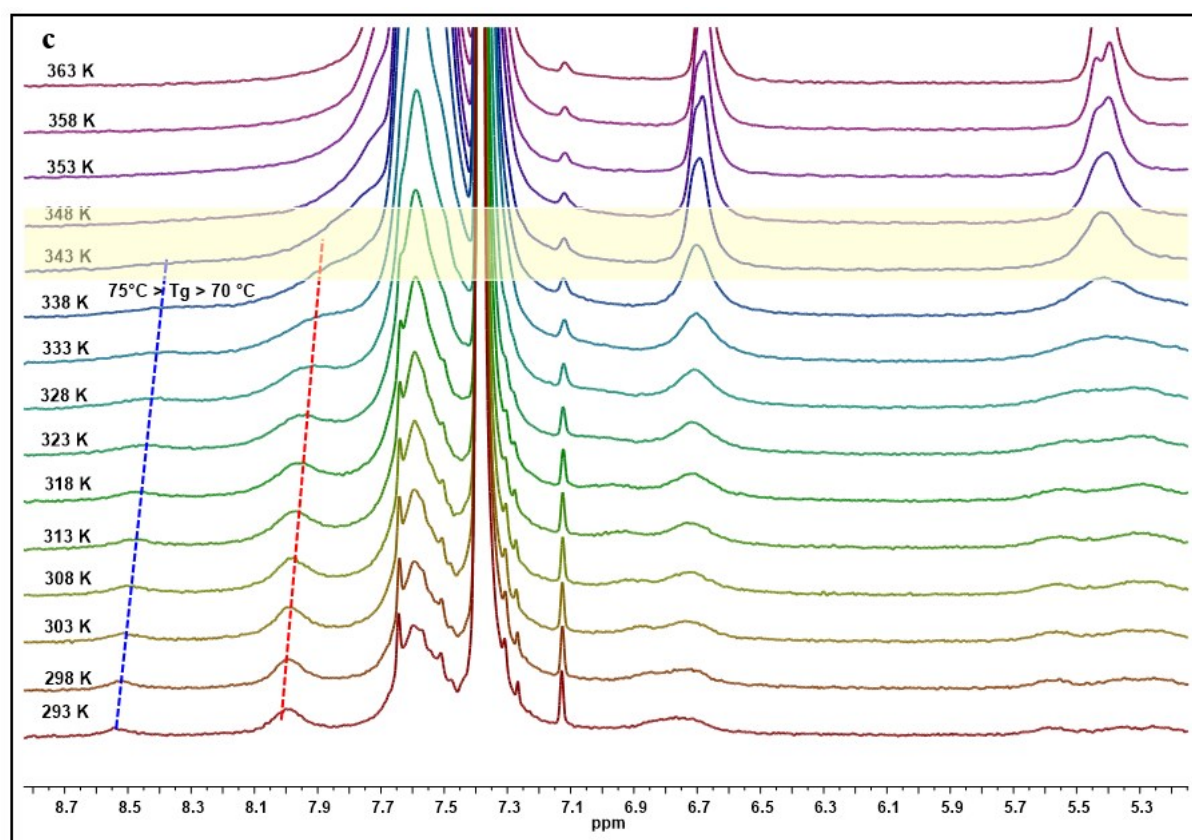

**Figure S4c.** Temperature-dependent  $^1\text{H}$  NMR (300 MHz) of compound **(2)** in gel state (0.5 wt%) in *p*-xylene- $d_{10}$ .



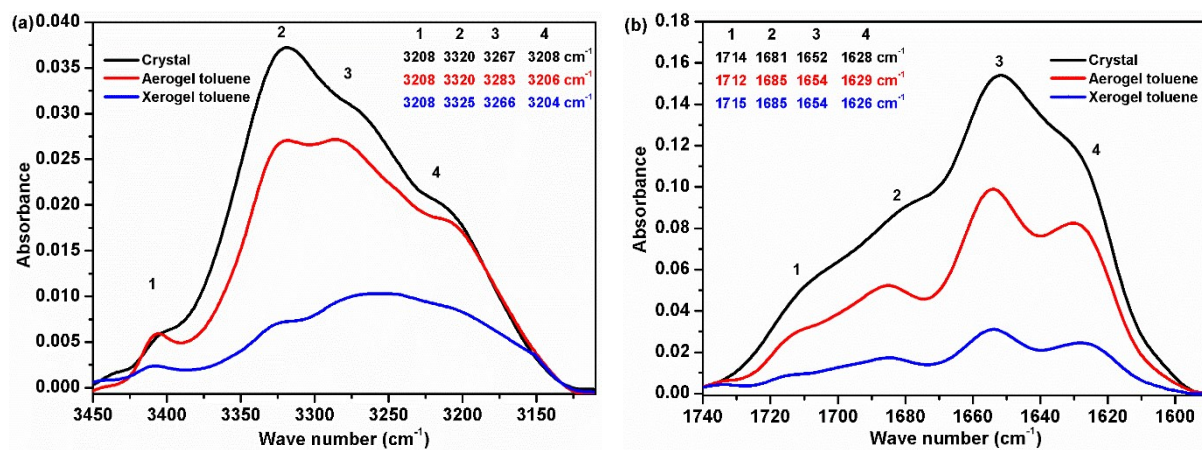

**Figure S5.** Comparison of the ATR-FTIR spectra in the crystal (black), aerogel (red), and xerogel (blue) states for (2); a) NH stretching region, and b) CO stretching region.

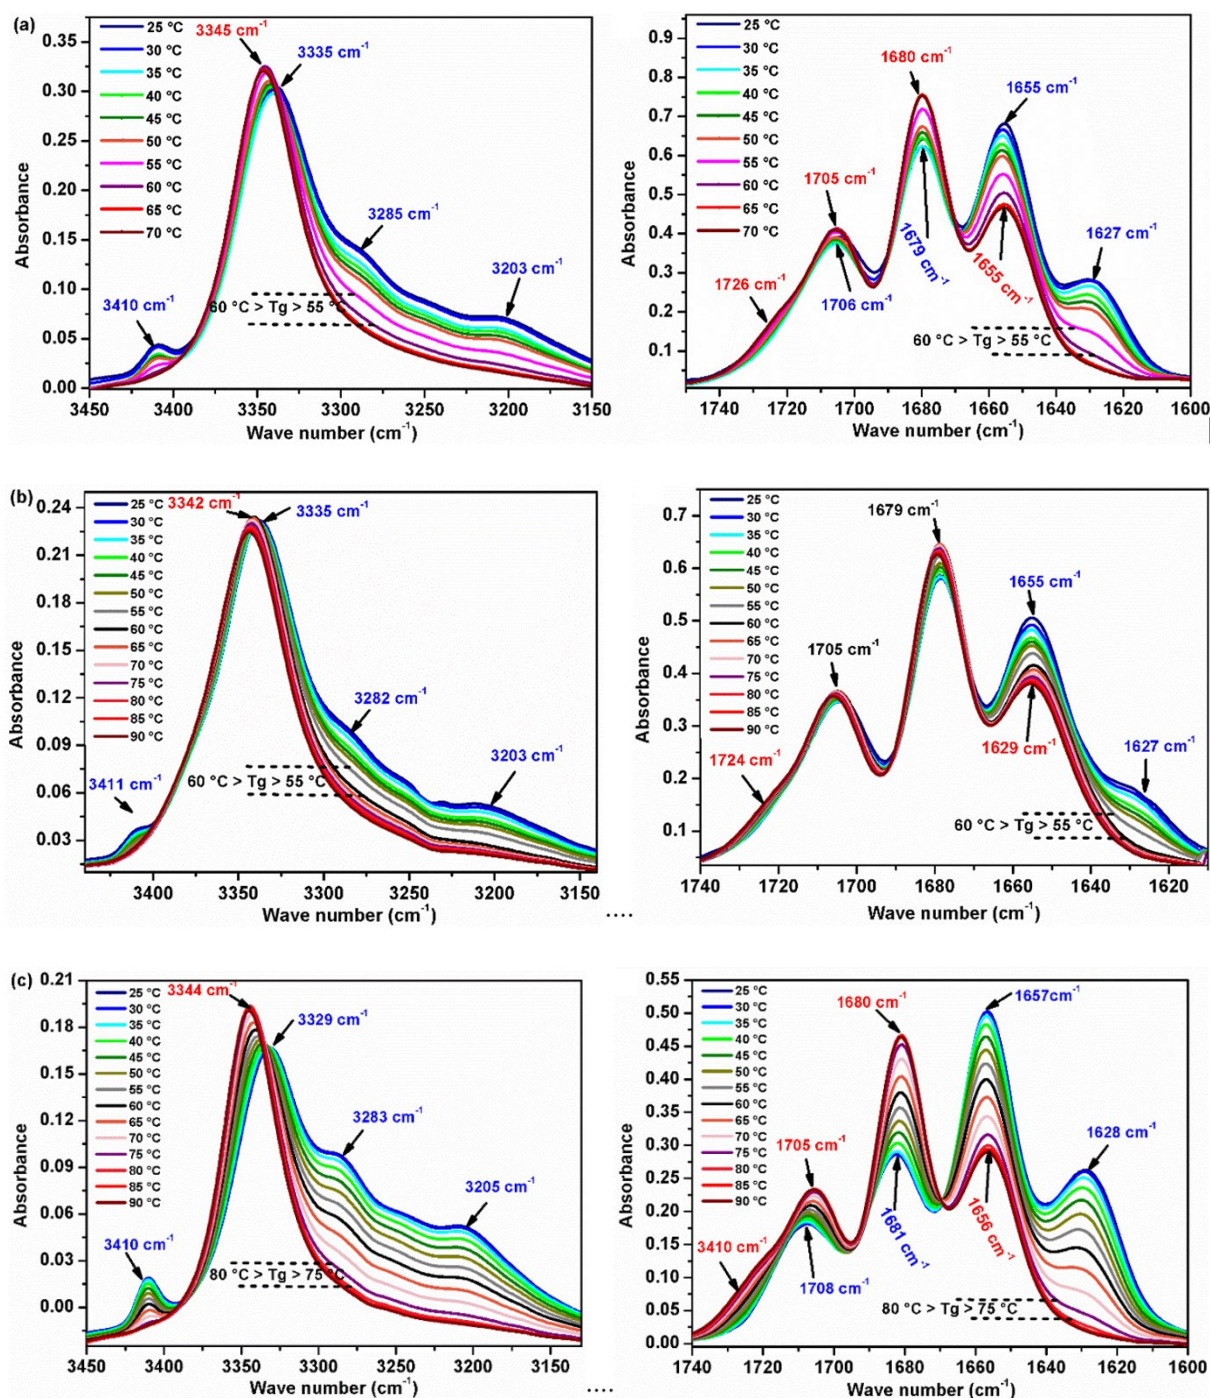

**Figure S6.** Temperature-dependent FTIR spectra of organogels from **(2)** at  $c = 0.5$  wt %; NH stretching region (left) and CO stretching region (right): (a) benzene ( $T = 25$  to  $70$  °C), (b) chlorobenzene ( $T = 25$  to  $90$  °C), and (c) *p*-xylene ( $T = 25$  to  $90$  °C).

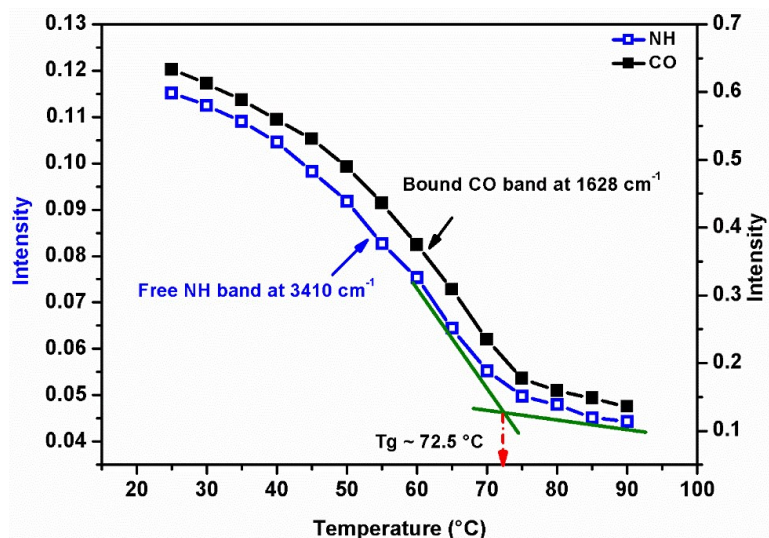

**Figure S7.** Sol-to-gel transition temperature ( $T_g$ ) by FTIR at the inflection point of the two curves of the free NH ( $3410\text{ cm}^{-1}$ ) and bound CO ( $1628\text{ cm}^{-1}$ ) groups for toluene- $d_8$  gel form (**2**) at 0.5 wt %.

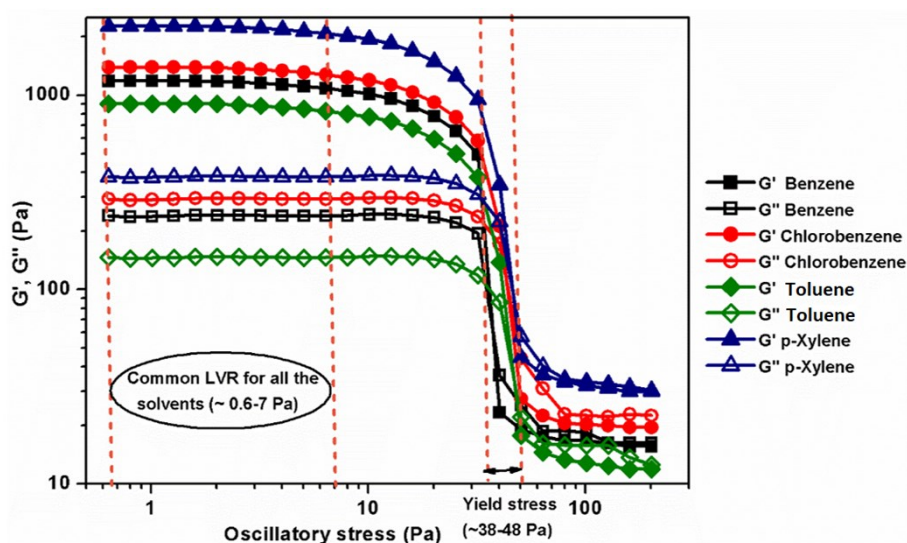

**Figure S8.** Oscillatory stress sweep experiments (OSS) for organogels of (**2**) ( $c=0.5\text{ wt}\%$ ,  $\omega = 0.63\text{ rad s}^{-1}$ ,  $T = 25\text{ }^{\circ}\text{C}$ ).

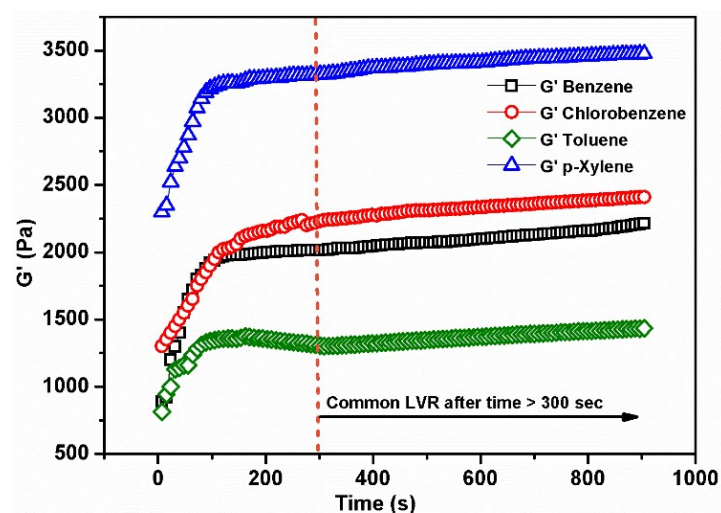

**Figure S9.** The rheogram shows the oscillatory time sweep experiments (OTS) for the organogels from (**2**); ( $c = 0.5\text{ wt}\%$ ,  $\omega = 0.628\text{ rad s}^{-1}$ ,  $\sigma = 1.5\text{ Pa}$ ,  $T = 25\text{ }^{\circ}\text{C}$ ).



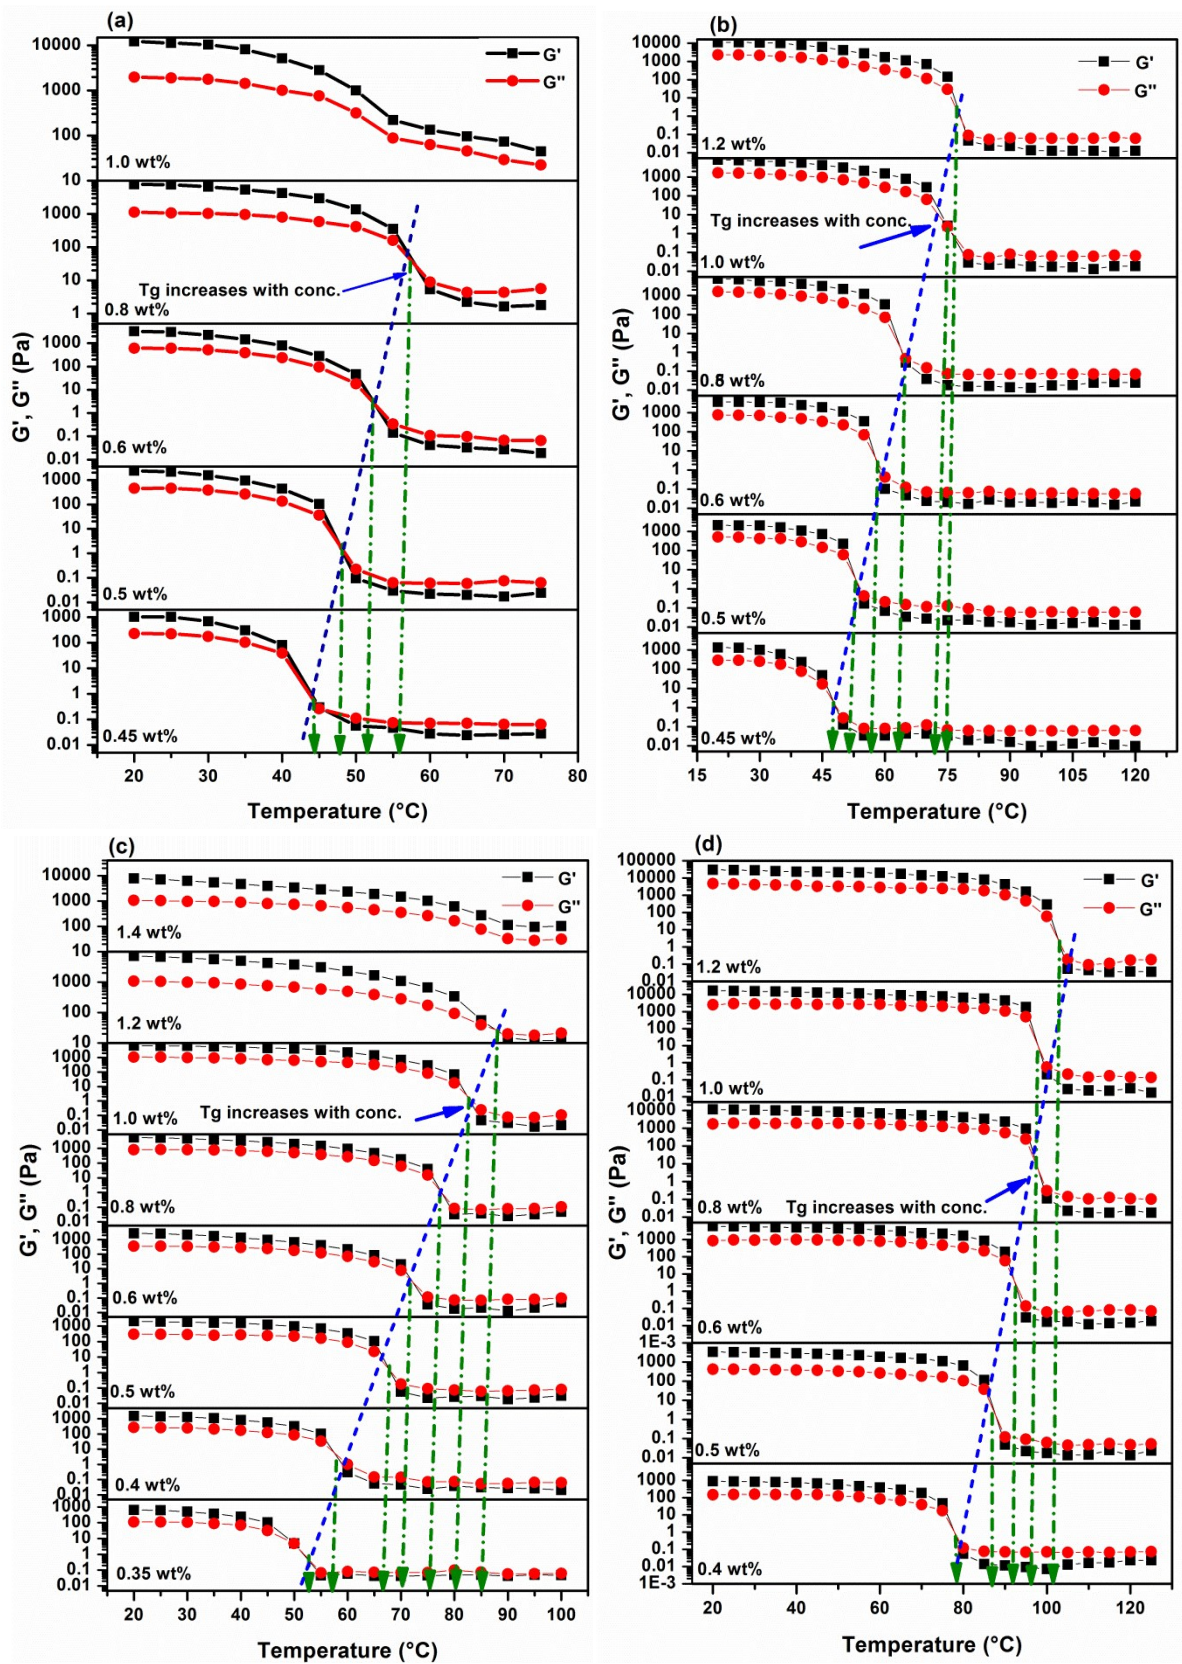

**Figure S10.** The rheograms for the oscillatory temperature sweep experiments, plot of the elastic ( $G'$ ) and viscous ( $G''$ ) moduli as a function of temperature ( $T$ ) for a range of concentrations in the different gelled solvents: a) benzene, b) chlorobenzene, c) toluene, and d) *p*-xylene; ( $\omega = 0.628 \text{ rad s}^{-1}$ ,  $\sigma = 1.5 \text{ Pa}$ ).



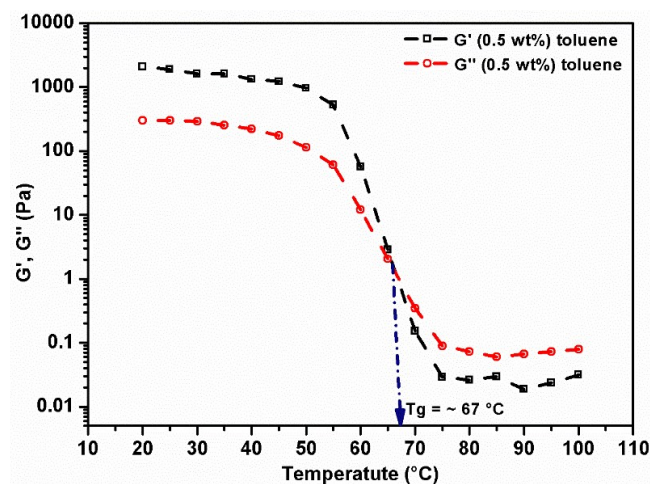

**Figure S11.** Oscillatory temperature sweep experiment shows the transition temperature of gel (**2**) from toluene ( $T_g = \sim 67^\circ\text{C}$ ); ( $c = 0.5\text{ wt\%}$ ,  $\sigma = 1.5\text{ Pa}$ ,  $\omega = 0.628\text{ rad s}^{-1}$ ).

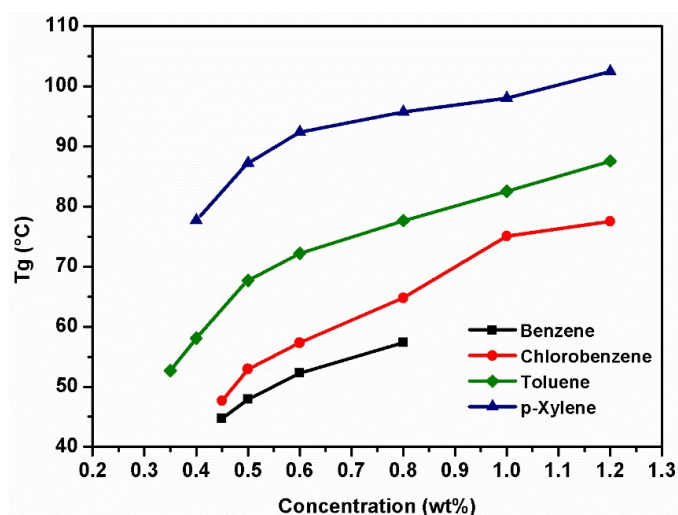

**Figure S12.** Variation of  $T_g$  ( $^\circ\text{C}$ ) as a function of concentration (wt%) for the organogels of (**2**) from different gelled solvents.

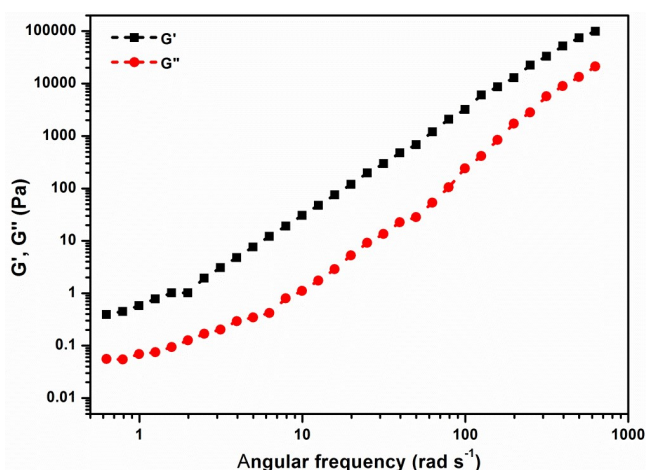

**Figure S13.** The rheogram of the oscillatory frequency sweep experiments (OFS);  $G'$  and  $G''$  as a function of angular frequency at the  $T_g$  of toluene gel from (**2**); ( $c = 0.5\text{ wt\%}$ ,  $T = 65^\circ\text{C}$ ,  $\sigma = 1.5\text{ Pa}$ ).

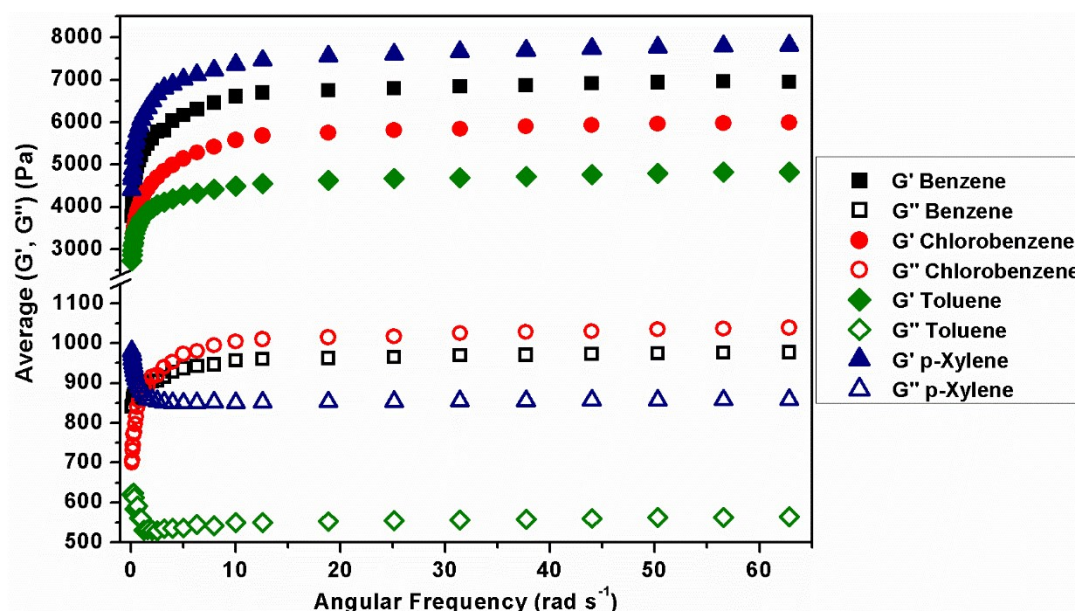

**Figure S14.** The rheogram shows the oscillatory frequency sweep experiments (OFS), plot of the average values of  $G'$  and  $G''$  for a range of concentrations in the different gelled solvents as a function of angular frequency ( $\omega$ ); ( $c = 0.4 - 1.0$  wt %,  $T = 25$  °C,  $\sigma = 1.5$  Pa).

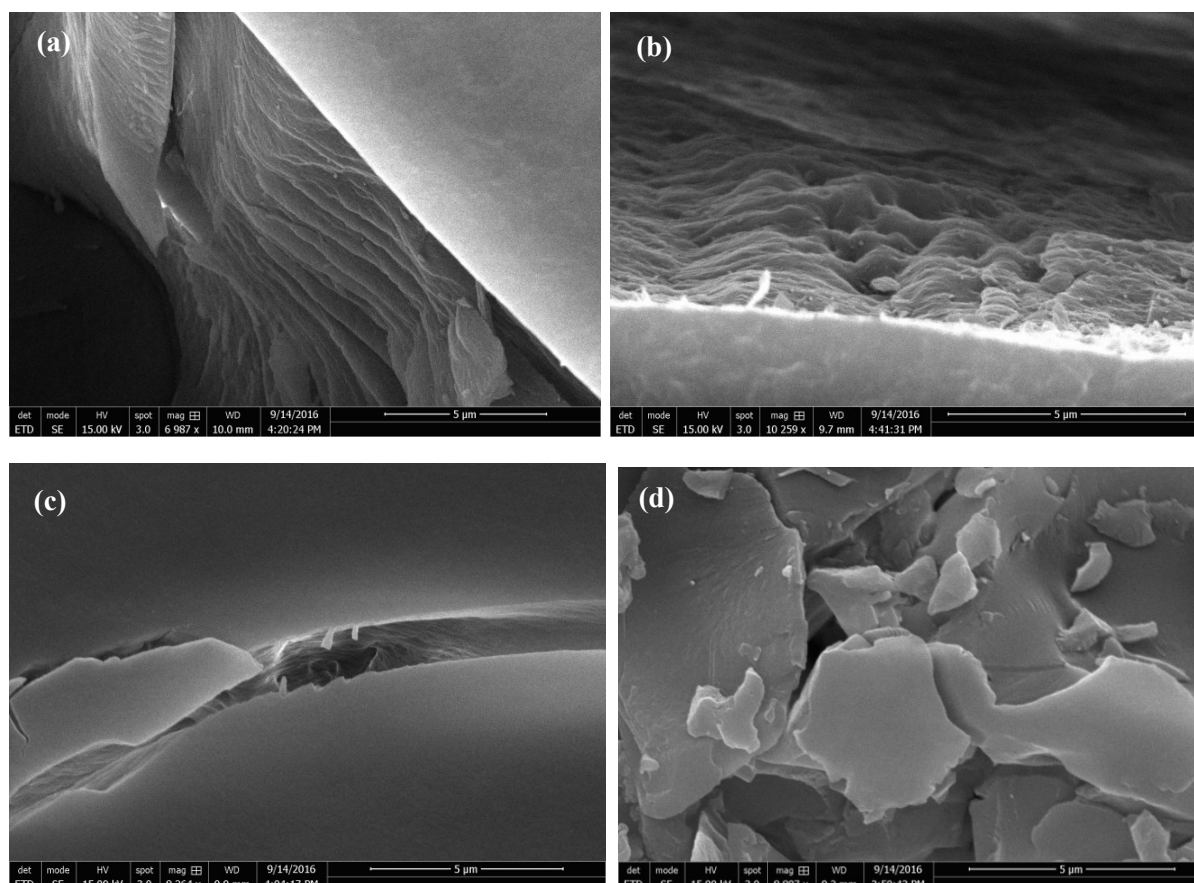

**Figure S15.** SEM images of xerogels obtained from air-drying of organogels of (2) from: (a) toluene, (b) benzene, (c) chlorobenzene, and (d)  $p$ -xylene.

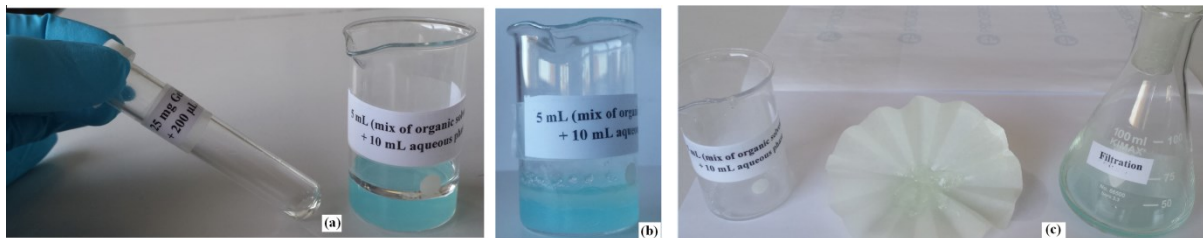

**Figure S16.** PSG by gelator (**2**): (a) addition of the concentrated ethanolic solution of (**2**) ( $c = 12.5\%$  w/v) to organic/aqueous mixture, (b) gelation of the organic phase, and (c) separation of the organogel by filtration.

**Table S1.** % of recovered organic solvent from (water/organic) mixture by PSG method

| Organic solvent  | % Organic solvent recovered |
|------------------|-----------------------------|
| Toluene          | 96                          |
| Benzene          | 94                          |
| <i>p</i> -Xylene | 82                          |
| Chlorobenzene    | 77                          |
| Mixture          | 84                          |
